# Supplementary material for: A unified understanding of magnetorheological elastomers for rapid and extreme stiffness tuning
Source: Royal Society of Chemistry journal article supplement (doi:10.1039/d3lp00109a), 2023-01-01
Supplement: d3lp00109a3.pdf [file d3lp00109a3.pdf]

# Supplementary Information

## **A unified understanding of magnetorheological elastomers for rapid and extreme stiffness tuning**

Edward J. Barron III<sup>1,2</sup>, Ella T. Williams<sup>1</sup>, Nathan Lazarus<sup>3</sup>, and Michael D. Bartlett<sup>1,2\*</sup>

<sup>1</sup>Mechanical Engineering, Soft Materials and Structures Lab, Virginia Tech, Blacksburg, VA 24061, USA.

<sup>2</sup>Macromolecules Innovation Institute, Virginia Tech, Blacksburg, VA 24061, USA.

<sup>3</sup>Electrical and Computer Engineering Department, University of Delaware, Newark DE 19716, USA.

\*Corresponding author email: [mbartlett@vt.edu](mailto:mbartlett@vt.edu)

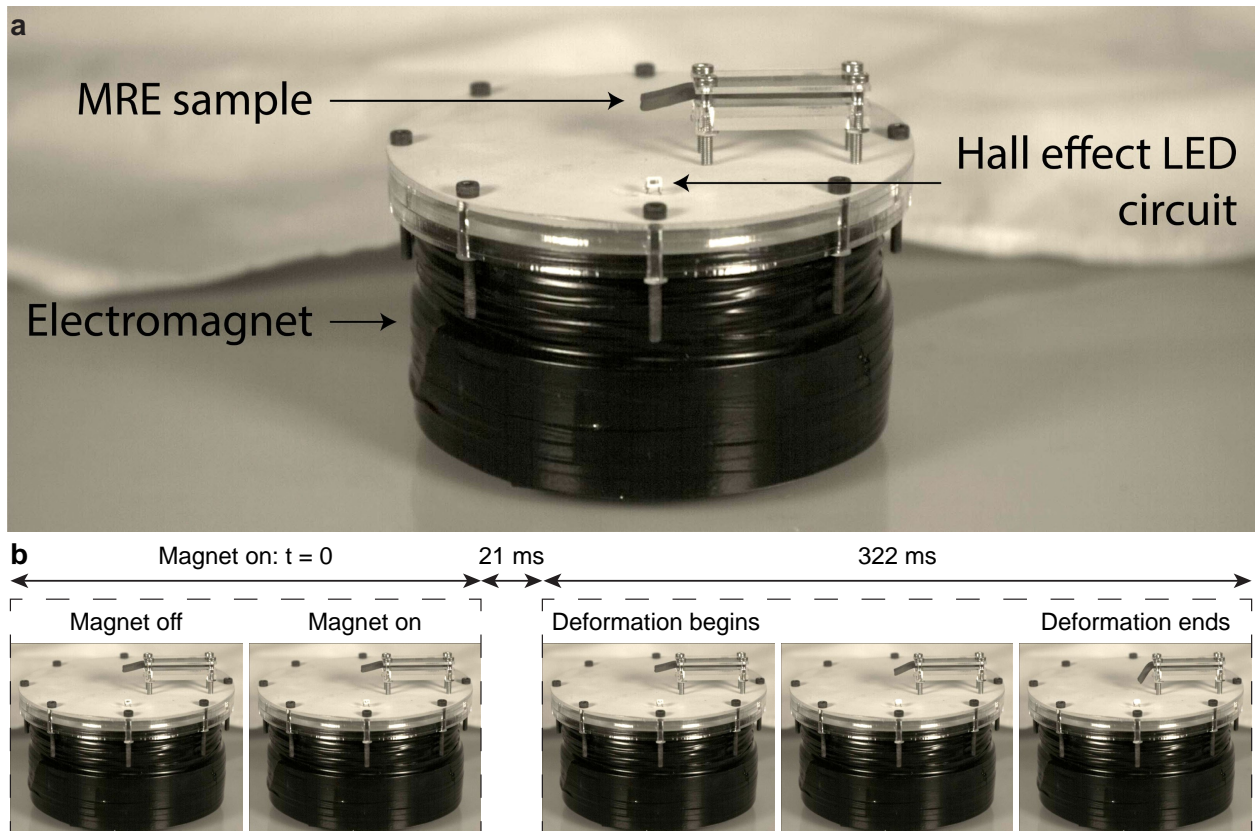

**Fig. S1 MRE response time.** a) Schematic of magneto-response testing fixture. Hall effect circuit activates LED in response to a magnetic field from the electromagnet. b) Measured response of MRE to applied magnetic field. MRE begins to respond within 21 ms of magnetic field activation. Full actuation of the MRE is measured to be 322 ms.

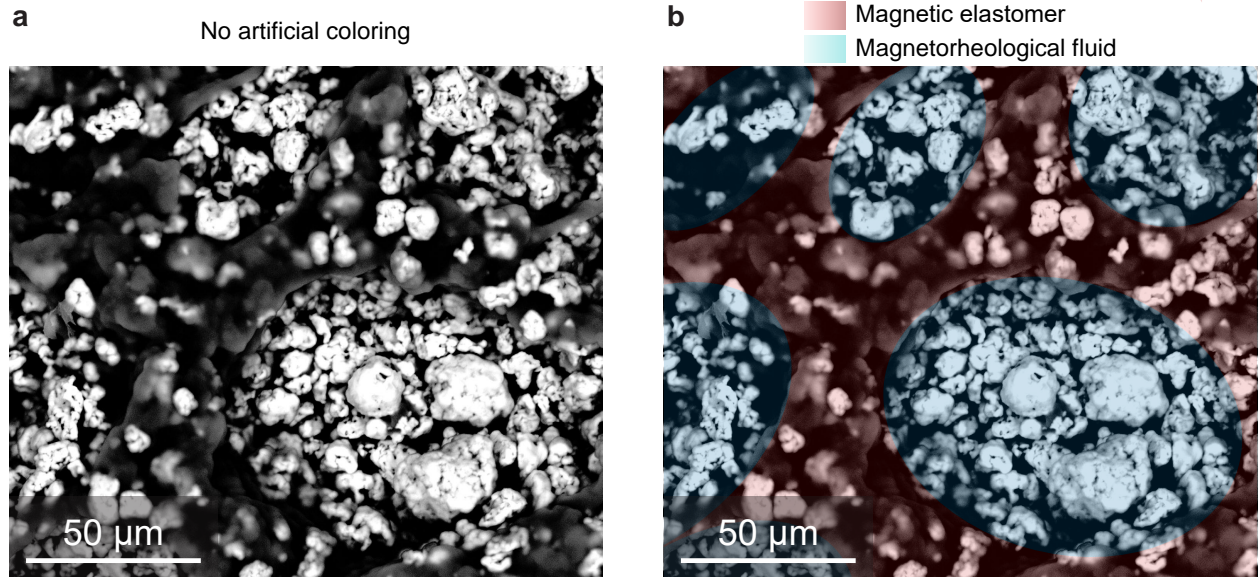

**Fig. S2 Hybrid composite MRE microstructure.** Scanning electron microscopy (SEM) of hybrid composite MRE cross-section. **a)** Uncolored SEM. **b)** Artificially colored hybrid composite MRE from Figure 1g. The magnetorheological fluid droplets are determined as the regions where elastomer is not visible on the surface.

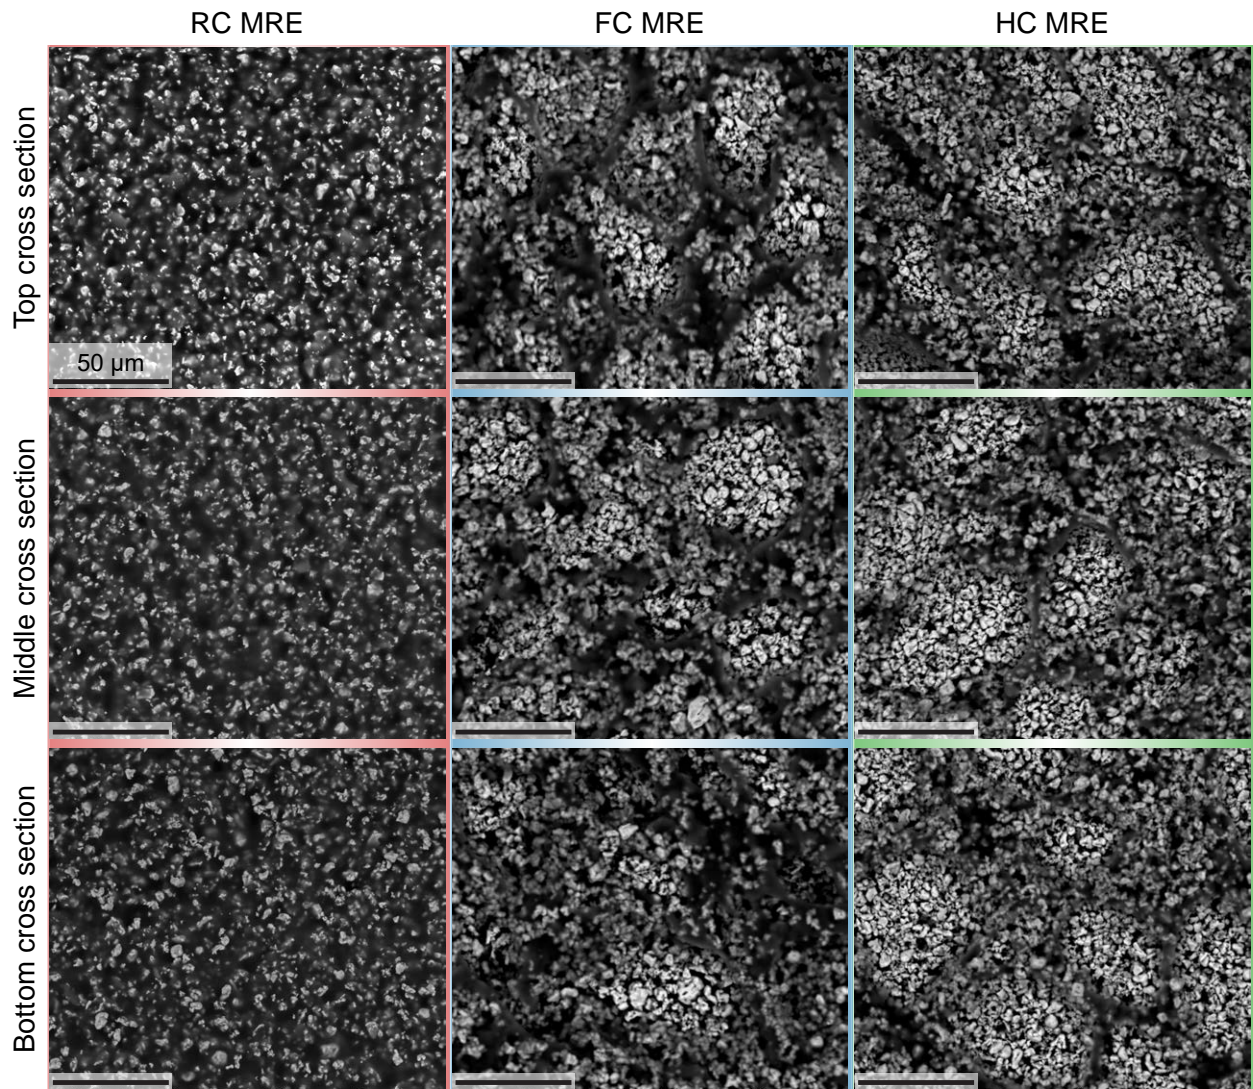

**Fig. S3 MREs with diverse microstructure.** SEM images of RC, FC, and HC MREs at different depths of the material (magnification = 1500x).



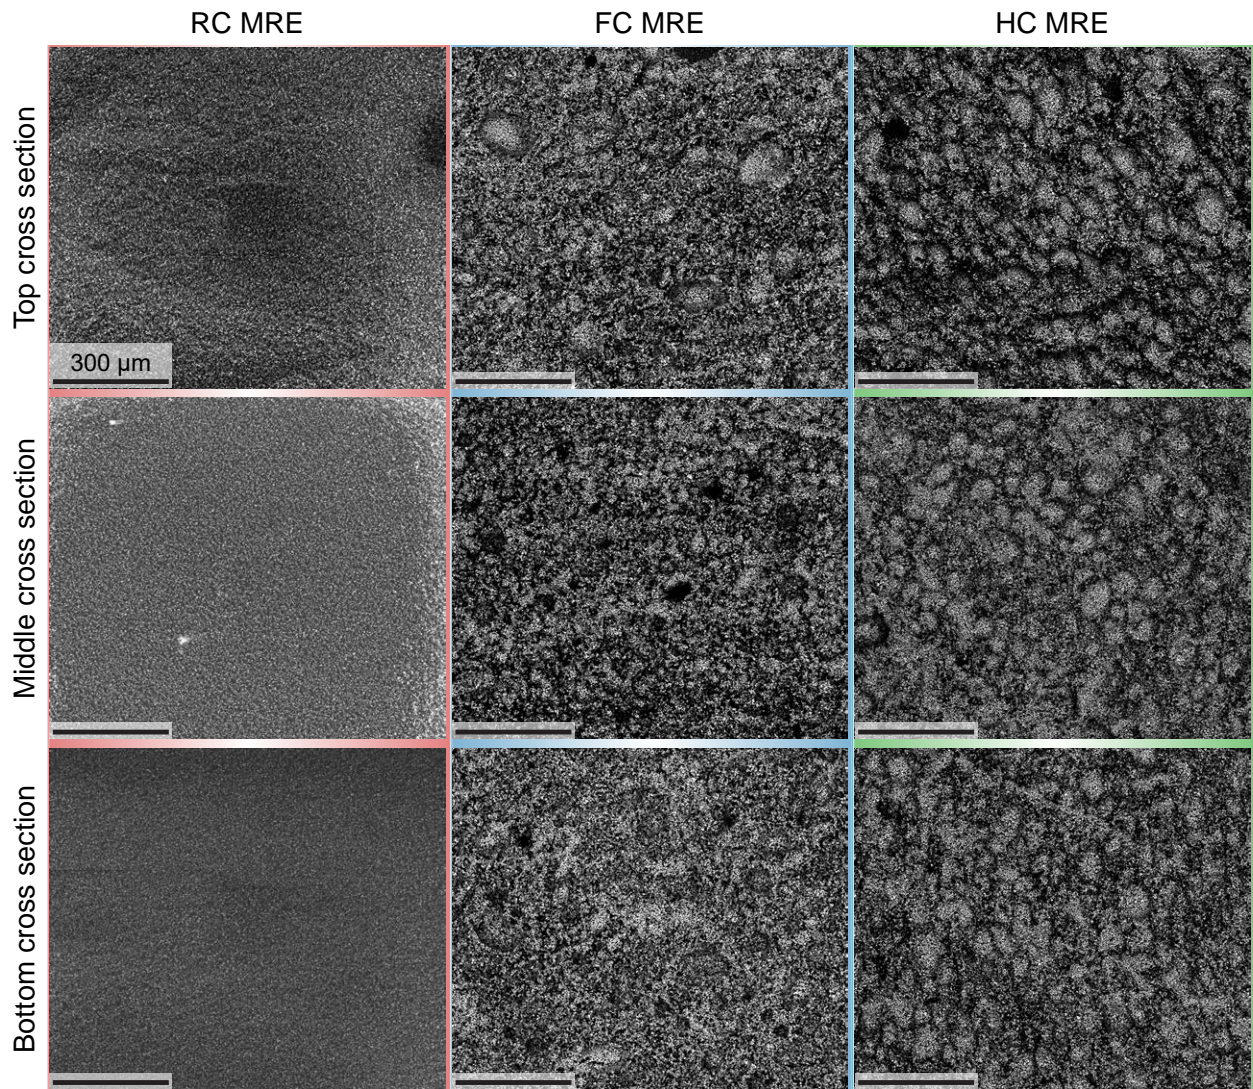

**Fig. S4 Microstructural imaging at lower magnification.** SEM images of RC, FC, and HC MREs at different depths of the material (magnification = 250x).

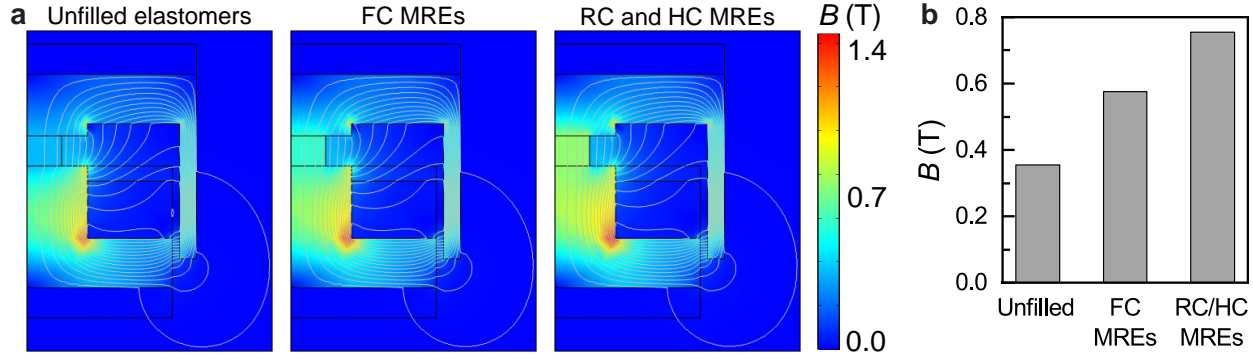

**Fig. S5 Magnetic flux density through MRE samples.** a) Finite element analysis of MRE testing fixture. b) Average magnetic flux density through compression testing specimens.

| $E_m$ (kPa) | Sylgard weight ratio |              | Ecoflex weight ratio |        | Total (wt%) |         |
|-------------|----------------------|--------------|----------------------|--------|-------------|---------|
|             | Base                 | Curing agent | Part A               | Part B | Sylgard     | Ecoflex |
| 8           | 60                   | 1            | 0                    | 0      | 100%        | 0%      |
| 60          | 45                   | 1            | 0                    | 0      | 100%        | 0%      |
| 200         | 0                    | 0            | 1                    | 1      | 0%          | 100%    |
| 900         | 10                   | 1            | 1                    | 1      | 50%         | 50%     |
| 3000        | 10                   | 1            | 0                    | 0      | 100%        | 0%      |

**Table S1:** Silicone elastomer compositions for control of matrix modulus.

|               | Elastomer phase (vol%) |           | MR fluid phase (vol%) |                  | Total (vol%)    |                |                  |
|---------------|------------------------|-----------|-----------------------|------------------|-----------------|----------------|------------------|
|               | Iron powder            | Elastomer | Iron powder           | Propylene glycol | Elastomer phase | MR fluid phase | Magnetic content |
| <b>RC MRE</b> | 25%                    | 75%       | 0%                    | 0%               | 100%            | 0%             | 25%              |
| <b>FC MRE</b> | 0%                     | 100%      | 35%                   | 65%              | 50%             | 50%            | 17.5%            |
| <b>HC MRE</b> | 15%                    | 85%       | 35%                   | 65%              | 50%             | 50%            | 25%              |

**Table S2:** MRE component volume fractions.

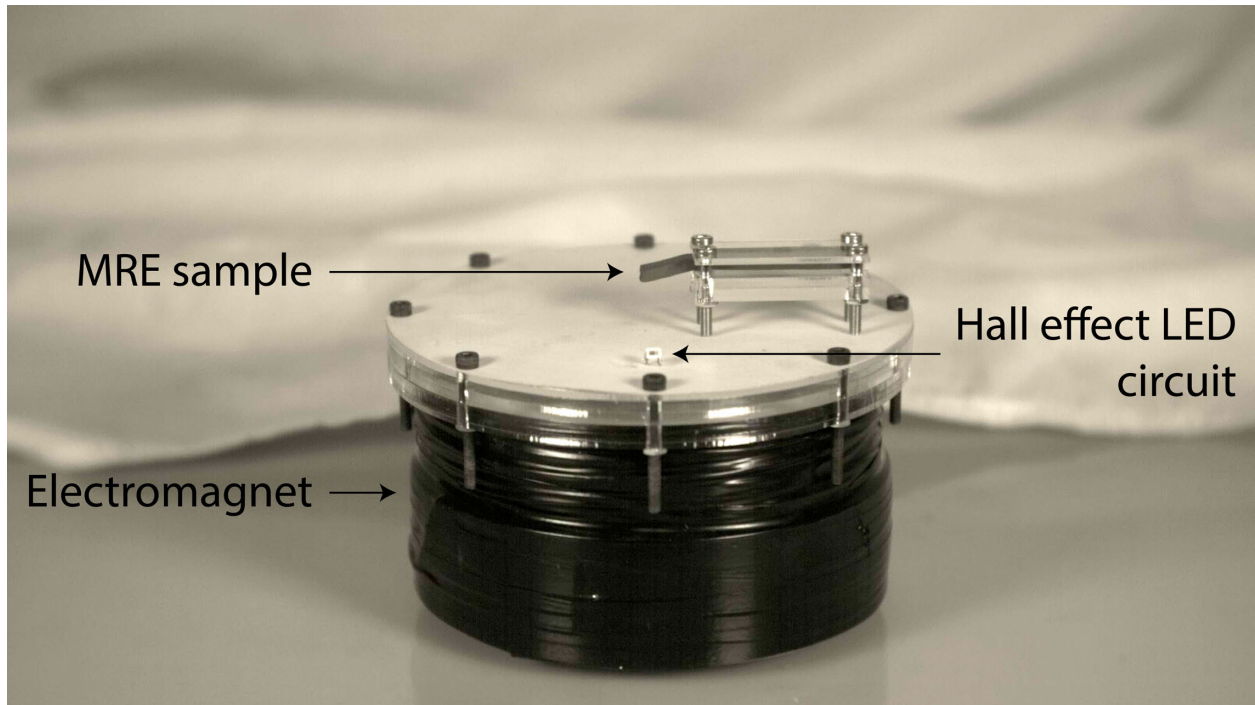

Movie S1: MRE rapid response time



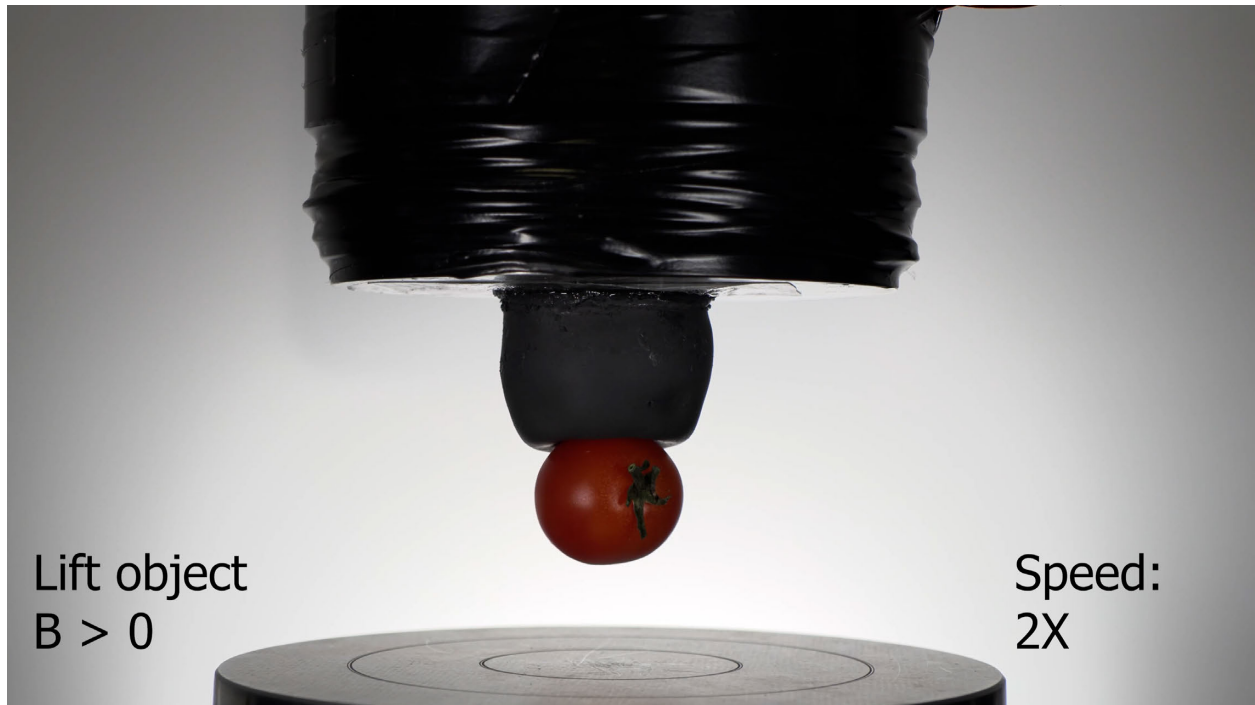

Lift object  
 $B > 0$

Speed:  
2X

Movie S2: Adaptive MRE gripper
